# Supplementary material for: Community-based intervention for cervical cancer screening uptake in a semi-urban area of Pokhara Metropolitan, Nepal (COBIN-C): study protocol for a cluster-randomized controlled trial
Source: PubMed Central journal article supplement (PMC7836185; doi:10.1186/s13063-021-05049-3), 2021-01-26
Supplement: 13063_2021_5049_MOESM2_ESM.pdf [file 13063_2021_5049_MOESM2_ESM.pdf]

| Participants identification number                                                                                                                                                                                                                                                                                                                                                                                                                                                                                                                                                                                                                                              |                                                                                                |                                                                                                                                                                                                                                                                                                                                                                                                                                                                                                                                                                                                                                                                                                                                                                                                                                                                                                                                                                                                                                                                                                                                                                                                                                                                           |          |       |                     |   |                                 |  |                         |   |  |  |                                            |   |  |  |                          |   |  |  |                                 |   |                                                                                             |    |                                        |   |  |  |                           |    |  |  |                      |   |  |  |                      |    |  |  |    |
|---------------------------------------------------------------------------------------------------------------------------------------------------------------------------------------------------------------------------------------------------------------------------------------------------------------------------------------------------------------------------------------------------------------------------------------------------------------------------------------------------------------------------------------------------------------------------------------------------------------------------------------------------------------------------------|------------------------------------------------------------------------------------------------|---------------------------------------------------------------------------------------------------------------------------------------------------------------------------------------------------------------------------------------------------------------------------------------------------------------------------------------------------------------------------------------------------------------------------------------------------------------------------------------------------------------------------------------------------------------------------------------------------------------------------------------------------------------------------------------------------------------------------------------------------------------------------------------------------------------------------------------------------------------------------------------------------------------------------------------------------------------------------------------------------------------------------------------------------------------------------------------------------------------------------------------------------------------------------------------------------------------------------------------------------------------------------|----------|-------|---------------------|---|---------------------------------|--|-------------------------|---|--|--|--------------------------------------------|---|--|--|--------------------------|---|--|--|---------------------------------|---|---------------------------------------------------------------------------------------------|----|----------------------------------------|---|--|--|---------------------------|----|--|--|----------------------|---|--|--|----------------------|----|--|--|----|
| <div style="display: flex; justify-content: space-around; width: 100%;"> <div style="border: 1px solid black; width: 20px; height: 20px;"></div> <div style="border: 1px solid black; width: 20px; height: 20px;"></div> <div style="border: 1px solid black; width: 20px; height: 20px;"></div> <div style="border: 1px solid black; width: 20px; height: 20px;"></div> <div style="border: 1px solid black; width: 20px; height: 20px;"></div> <div style="border: 1px solid black; width: 20px; height: 20px;"></div> <div style="border: 1px solid black; width: 20px; height: 20px;"></div> <div style="border: 1px solid black; width: 20px; height: 20px;"></div> </div> |                                                                                                |                                                                                                                                                                                                                                                                                                                                                                                                                                                                                                                                                                                                                                                                                                                                                                                                                                                                                                                                                                                                                                                                                                                                                                                                                                                                           |          |       |                     |   |                                 |  |                         |   |  |  |                                            |   |  |  |                          |   |  |  |                                 |   |                                                                                             |    |                                        |   |  |  |                           |    |  |  |                      |   |  |  |                      |    |  |  |    |
| SOCIO DEMOGRAPHIC INFORMATION                                                                                                                                                                                                                                                                                                                                                                                                                                                                                                                                                                                                                                                   |                                                                                                |                                                                                                                                                                                                                                                                                                                                                                                                                                                                                                                                                                                                                                                                                                                                                                                                                                                                                                                                                                                                                                                                                                                                                                                                                                                                           |          |       |                     |   |                                 |  |                         |   |  |  |                                            |   |  |  |                          |   |  |  |                                 |   |                                                                                             |    |                                        |   |  |  |                           |    |  |  |                      |   |  |  |                      |    |  |  |    |
| Questions                                                                                                                                                                                                                                                                                                                                                                                                                                                                                                                                                                                                                                                                       | Responses                                                                                      |                                                                                                                                                                                                                                                                                                                                                                                                                                                                                                                                                                                                                                                                                                                                                                                                                                                                                                                                                                                                                                                                                                                                                                                                                                                                           |          | Codes |                     |   |                                 |  |                         |   |  |  |                                            |   |  |  |                          |   |  |  |                                 |   |                                                                                             |    |                                        |   |  |  |                           |    |  |  |                      |   |  |  |                      |    |  |  |    |
| 12.                                                                                                                                                                                                                                                                                                                                                                                                                                                                                                                                                                                                                                                                             | What is your Date of Birth?                                                                    | <table border="1" style="margin-left: auto; margin-right: auto;"> <tr> <td style="width: 20px; height: 20px;"></td> <td style="width: 20px; height: 20px;"></td> <td style="width: 20px; height: 20px; background-color: black;"></td> <td style="width: 20px; height: 20px;"></td> <td style="width: 20px; height: 20px;"></td> <td style="width: 20px; height: 20px; background-color: black;"></td> <td style="width: 20px; height: 20px;"></td> </tr> <tr> <td style="width: 20px; height: 20px;"></td> <td style="width: 20px; height: 20px;"></td> <td style="width: 20px; height: 20px; background-color: black;"></td> <td style="width: 20px; height: 20px;"></td> <td style="width: 20px; height: 20px;"></td> <td style="width: 20px; height: 20px; background-color: black;"></td> <td style="width: 20px; height: 20px;"></td> </tr> </table>                                                                                                                                  |          |       |                     |   |                                 |  |                         |   |  |  |                                            |   |  |  |                          |   |  |  |                                 |   | <p style="text-align: right;"><b>B.S.</b></p> <p style="text-align: right;"><b>A.D.</b></p> | C1 |                                        |   |  |  |                           |    |  |  |                      |   |  |  |                      |    |  |  |    |
|                                                                                                                                                                                                                                                                                                                                                                                                                                                                                                                                                                                                                                                                                 |                                                                                                |                                                                                                                                                                                                                                                                                                                                                                                                                                                                                                                                                                                                                                                                                                                                                                                                                                                                                                                                                                                                                                                                                                                                                                                                                                                                           |          |       |                     |   |                                 |  |                         |   |  |  |                                            |   |  |  |                          |   |  |  |                                 |   |                                                                                             |    |                                        |   |  |  |                           |    |  |  |                      |   |  |  |                      |    |  |  |    |
|                                                                                                                                                                                                                                                                                                                                                                                                                                                                                                                                                                                                                                                                                 |                                                                                                |                                                                                                                                                                                                                                                                                                                                                                                                                                                                                                                                                                                                                                                                                                                                                                                                                                                                                                                                                                                                                                                                                                                                                                                                                                                                           |          |       |                     |   |                                 |  |                         |   |  |  |                                            |   |  |  |                          |   |  |  |                                 |   |                                                                                             |    |                                        |   |  |  |                           |    |  |  |                      |   |  |  |                      |    |  |  |    |
| 13.                                                                                                                                                                                                                                                                                                                                                                                                                                                                                                                                                                                                                                                                             | What is your age?                                                                              | ..... completed years                                                                                                                                                                                                                                                                                                                                                                                                                                                                                                                                                                                                                                                                                                                                                                                                                                                                                                                                                                                                                                                                                                                                                                                                                                                     |          |       | C2                  |   |                                 |  |                         |   |  |  |                                            |   |  |  |                          |   |  |  |                                 |   |                                                                                             |    |                                        |   |  |  |                           |    |  |  |                      |   |  |  |                      |    |  |  |    |
| 14.                                                                                                                                                                                                                                                                                                                                                                                                                                                                                                                                                                                                                                                                             | How many years did you spend for formal education?<br>(Don't count pre-primary education)      | <table border="1" style="margin-left: auto; margin-right: auto;"> <tr> <td style="width: 20px; height: 20px;"></td> <td style="width: 20px; height: 20px;"></td> </tr> </table>                                                                                                                                                                                                                                                                                                                                                                                                                                                                                                                                                                                                                                                                                                                                                                                                                                                                                                                                                                                                                                                                                           |          |       | completed years     |   | C3                              |  |                         |   |  |  |                                            |   |  |  |                          |   |  |  |                                 |   |                                                                                             |    |                                        |   |  |  |                           |    |  |  |                      |   |  |  |                      |    |  |  |    |
|                                                                                                                                                                                                                                                                                                                                                                                                                                                                                                                                                                                                                                                                                 |                                                                                                |                                                                                                                                                                                                                                                                                                                                                                                                                                                                                                                                                                                                                                                                                                                                                                                                                                                                                                                                                                                                                                                                                                                                                                                                                                                                           |          |       |                     |   |                                 |  |                         |   |  |  |                                            |   |  |  |                          |   |  |  |                                 |   |                                                                                             |    |                                        |   |  |  |                           |    |  |  |                      |   |  |  |                      |    |  |  |    |
| 15.                                                                                                                                                                                                                                                                                                                                                                                                                                                                                                                                                                                                                                                                             | What is the highest level of education you have completed?                                     | <table style="width: 100%; border-collapse: collapse;"> <tr> <td style="text-align: right;">Illiterate</td> <td style="text-align: right;">0</td> <td></td> <td></td> </tr> <tr> <td style="text-align: right;">No formal schooling</td> <td style="text-align: right;">1</td> <td></td> <td></td> </tr> <tr> <td style="text-align: right;">Less than primary school</td> <td style="text-align: right;">2</td> <td></td> <td></td> </tr> <tr> <td style="text-align: right;">Primary school completed</td> <td style="text-align: right;">3</td> <td></td> <td></td> </tr> <tr> <td style="text-align: right;">Secondary school completed</td> <td style="text-align: right;">4</td> <td></td> <td></td> </tr> <tr> <td style="text-align: right;">Higher secondary (10+2)/ PCL completed</td> <td style="text-align: right;">5</td> <td></td> <td></td> </tr> <tr> <td style="text-align: right;">Bachelor degree completed</td> <td style="text-align: right;">6</td> <td></td> <td></td> </tr> <tr> <td style="text-align: right;">Post graduate degree</td> <td style="text-align: right;">7</td> <td></td> <td></td> </tr> <tr> <td style="text-align: right;">Prefer not to answer</td> <td style="text-align: right;">88</td> <td></td> <td></td> </tr> </table> |          |       | Illiterate          | 0 |                                 |  | No formal schooling     | 1 |  |  | Less than primary school                   | 2 |  |  | Primary school completed | 3 |  |  | Secondary school completed      | 4 |                                                                                             |    | Higher secondary (10+2)/ PCL completed | 5 |  |  | Bachelor degree completed | 6  |  |  | Post graduate degree | 7 |  |  | Prefer not to answer | 88 |  |  | C4 |
| Illiterate                                                                                                                                                                                                                                                                                                                                                                                                                                                                                                                                                                                                                                                                      | 0                                                                                              |                                                                                                                                                                                                                                                                                                                                                                                                                                                                                                                                                                                                                                                                                                                                                                                                                                                                                                                                                                                                                                                                                                                                                                                                                                                                           |          |       |                     |   |                                 |  |                         |   |  |  |                                            |   |  |  |                          |   |  |  |                                 |   |                                                                                             |    |                                        |   |  |  |                           |    |  |  |                      |   |  |  |                      |    |  |  |    |
| No formal schooling                                                                                                                                                                                                                                                                                                                                                                                                                                                                                                                                                                                                                                                             | 1                                                                                              |                                                                                                                                                                                                                                                                                                                                                                                                                                                                                                                                                                                                                                                                                                                                                                                                                                                                                                                                                                                                                                                                                                                                                                                                                                                                           |          |       |                     |   |                                 |  |                         |   |  |  |                                            |   |  |  |                          |   |  |  |                                 |   |                                                                                             |    |                                        |   |  |  |                           |    |  |  |                      |   |  |  |                      |    |  |  |    |
| Less than primary school                                                                                                                                                                                                                                                                                                                                                                                                                                                                                                                                                                                                                                                        | 2                                                                                              |                                                                                                                                                                                                                                                                                                                                                                                                                                                                                                                                                                                                                                                                                                                                                                                                                                                                                                                                                                                                                                                                                                                                                                                                                                                                           |          |       |                     |   |                                 |  |                         |   |  |  |                                            |   |  |  |                          |   |  |  |                                 |   |                                                                                             |    |                                        |   |  |  |                           |    |  |  |                      |   |  |  |                      |    |  |  |    |
| Primary school completed                                                                                                                                                                                                                                                                                                                                                                                                                                                                                                                                                                                                                                                        | 3                                                                                              |                                                                                                                                                                                                                                                                                                                                                                                                                                                                                                                                                                                                                                                                                                                                                                                                                                                                                                                                                                                                                                                                                                                                                                                                                                                                           |          |       |                     |   |                                 |  |                         |   |  |  |                                            |   |  |  |                          |   |  |  |                                 |   |                                                                                             |    |                                        |   |  |  |                           |    |  |  |                      |   |  |  |                      |    |  |  |    |
| Secondary school completed                                                                                                                                                                                                                                                                                                                                                                                                                                                                                                                                                                                                                                                      | 4                                                                                              |                                                                                                                                                                                                                                                                                                                                                                                                                                                                                                                                                                                                                                                                                                                                                                                                                                                                                                                                                                                                                                                                                                                                                                                                                                                                           |          |       |                     |   |                                 |  |                         |   |  |  |                                            |   |  |  |                          |   |  |  |                                 |   |                                                                                             |    |                                        |   |  |  |                           |    |  |  |                      |   |  |  |                      |    |  |  |    |
| Higher secondary (10+2)/ PCL completed                                                                                                                                                                                                                                                                                                                                                                                                                                                                                                                                                                                                                                          | 5                                                                                              |                                                                                                                                                                                                                                                                                                                                                                                                                                                                                                                                                                                                                                                                                                                                                                                                                                                                                                                                                                                                                                                                                                                                                                                                                                                                           |          |       |                     |   |                                 |  |                         |   |  |  |                                            |   |  |  |                          |   |  |  |                                 |   |                                                                                             |    |                                        |   |  |  |                           |    |  |  |                      |   |  |  |                      |    |  |  |    |
| Bachelor degree completed                                                                                                                                                                                                                                                                                                                                                                                                                                                                                                                                                                                                                                                       | 6                                                                                              |                                                                                                                                                                                                                                                                                                                                                                                                                                                                                                                                                                                                                                                                                                                                                                                                                                                                                                                                                                                                                                                                                                                                                                                                                                                                           |          |       |                     |   |                                 |  |                         |   |  |  |                                            |   |  |  |                          |   |  |  |                                 |   |                                                                                             |    |                                        |   |  |  |                           |    |  |  |                      |   |  |  |                      |    |  |  |    |
| Post graduate degree                                                                                                                                                                                                                                                                                                                                                                                                                                                                                                                                                                                                                                                            | 7                                                                                              |                                                                                                                                                                                                                                                                                                                                                                                                                                                                                                                                                                                                                                                                                                                                                                                                                                                                                                                                                                                                                                                                                                                                                                                                                                                                           |          |       |                     |   |                                 |  |                         |   |  |  |                                            |   |  |  |                          |   |  |  |                                 |   |                                                                                             |    |                                        |   |  |  |                           |    |  |  |                      |   |  |  |                      |    |  |  |    |
| Prefer not to answer                                                                                                                                                                                                                                                                                                                                                                                                                                                                                                                                                                                                                                                            | 88                                                                                             |                                                                                                                                                                                                                                                                                                                                                                                                                                                                                                                                                                                                                                                                                                                                                                                                                                                                                                                                                                                                                                                                                                                                                                                                                                                                           |          |       |                     |   |                                 |  |                         |   |  |  |                                            |   |  |  |                          |   |  |  |                                 |   |                                                                                             |    |                                        |   |  |  |                           |    |  |  |                      |   |  |  |                      |    |  |  |    |
| 16.                                                                                                                                                                                                                                                                                                                                                                                                                                                                                                                                                                                                                                                                             | What is your ethnic background?                                                                | <table style="width: 100%; border-collapse: collapse;"> <tr> <td style="text-align: right;">Dalit</td> <td style="text-align: right;">1</td> <td></td> <td></td> </tr> <tr> <td style="text-align: right;">Disadvantaged Janajatis</td> <td style="text-align: right;">2</td> <td></td> <td></td> </tr> <tr> <td style="text-align: right;">Disadvantaged non-dalit terai caste groups</td> <td style="text-align: right;">3</td> <td></td> <td></td> </tr> <tr> <td style="text-align: right;">Religious minorities</td> <td style="text-align: right;">4</td> <td></td> <td></td> </tr> <tr> <td style="text-align: right;">Relatively advantaged Janajatis</td> <td style="text-align: right;">5</td> <td></td> <td></td> </tr> <tr> <td style="text-align: right;">Upper caste groups</td> <td style="text-align: right;">6</td> <td></td> <td></td> </tr> <tr> <td style="text-align: right;">Prefer not to answer</td> <td style="text-align: right;">88</td> <td></td> <td></td> </tr> </table>                                                                                                                                                                                                                                                                    |          |       | Dalit               | 1 |                                 |  | Disadvantaged Janajatis | 2 |  |  | Disadvantaged non-dalit terai caste groups | 3 |  |  | Religious minorities     | 4 |  |  | Relatively advantaged Janajatis | 5 |                                                                                             |    | Upper caste groups                     | 6 |  |  | Prefer not to answer      | 88 |  |  | C5                   |   |  |  |                      |    |  |  |    |
| Dalit                                                                                                                                                                                                                                                                                                                                                                                                                                                                                                                                                                                                                                                                           | 1                                                                                              |                                                                                                                                                                                                                                                                                                                                                                                                                                                                                                                                                                                                                                                                                                                                                                                                                                                                                                                                                                                                                                                                                                                                                                                                                                                                           |          |       |                     |   |                                 |  |                         |   |  |  |                                            |   |  |  |                          |   |  |  |                                 |   |                                                                                             |    |                                        |   |  |  |                           |    |  |  |                      |   |  |  |                      |    |  |  |    |
| Disadvantaged Janajatis                                                                                                                                                                                                                                                                                                                                                                                                                                                                                                                                                                                                                                                         | 2                                                                                              |                                                                                                                                                                                                                                                                                                                                                                                                                                                                                                                                                                                                                                                                                                                                                                                                                                                                                                                                                                                                                                                                                                                                                                                                                                                                           |          |       |                     |   |                                 |  |                         |   |  |  |                                            |   |  |  |                          |   |  |  |                                 |   |                                                                                             |    |                                        |   |  |  |                           |    |  |  |                      |   |  |  |                      |    |  |  |    |
| Disadvantaged non-dalit terai caste groups                                                                                                                                                                                                                                                                                                                                                                                                                                                                                                                                                                                                                                      | 3                                                                                              |                                                                                                                                                                                                                                                                                                                                                                                                                                                                                                                                                                                                                                                                                                                                                                                                                                                                                                                                                                                                                                                                                                                                                                                                                                                                           |          |       |                     |   |                                 |  |                         |   |  |  |                                            |   |  |  |                          |   |  |  |                                 |   |                                                                                             |    |                                        |   |  |  |                           |    |  |  |                      |   |  |  |                      |    |  |  |    |
| Religious minorities                                                                                                                                                                                                                                                                                                                                                                                                                                                                                                                                                                                                                                                            | 4                                                                                              |                                                                                                                                                                                                                                                                                                                                                                                                                                                                                                                                                                                                                                                                                                                                                                                                                                                                                                                                                                                                                                                                                                                                                                                                                                                                           |          |       |                     |   |                                 |  |                         |   |  |  |                                            |   |  |  |                          |   |  |  |                                 |   |                                                                                             |    |                                        |   |  |  |                           |    |  |  |                      |   |  |  |                      |    |  |  |    |
| Relatively advantaged Janajatis                                                                                                                                                                                                                                                                                                                                                                                                                                                                                                                                                                                                                                                 | 5                                                                                              |                                                                                                                                                                                                                                                                                                                                                                                                                                                                                                                                                                                                                                                                                                                                                                                                                                                                                                                                                                                                                                                                                                                                                                                                                                                                           |          |       |                     |   |                                 |  |                         |   |  |  |                                            |   |  |  |                          |   |  |  |                                 |   |                                                                                             |    |                                        |   |  |  |                           |    |  |  |                      |   |  |  |                      |    |  |  |    |
| Upper caste groups                                                                                                                                                                                                                                                                                                                                                                                                                                                                                                                                                                                                                                                              | 6                                                                                              |                                                                                                                                                                                                                                                                                                                                                                                                                                                                                                                                                                                                                                                                                                                                                                                                                                                                                                                                                                                                                                                                                                                                                                                                                                                                           |          |       |                     |   |                                 |  |                         |   |  |  |                                            |   |  |  |                          |   |  |  |                                 |   |                                                                                             |    |                                        |   |  |  |                           |    |  |  |                      |   |  |  |                      |    |  |  |    |
| Prefer not to answer                                                                                                                                                                                                                                                                                                                                                                                                                                                                                                                                                                                                                                                            | 88                                                                                             |                                                                                                                                                                                                                                                                                                                                                                                                                                                                                                                                                                                                                                                                                                                                                                                                                                                                                                                                                                                                                                                                                                                                                                                                                                                                           |          |       |                     |   |                                 |  |                         |   |  |  |                                            |   |  |  |                          |   |  |  |                                 |   |                                                                                             |    |                                        |   |  |  |                           |    |  |  |                      |   |  |  |                      |    |  |  |    |
| 17.                                                                                                                                                                                                                                                                                                                                                                                                                                                                                                                                                                                                                                                                             | What is your religion                                                                          | <table style="width: 100%; border-collapse: collapse;"> <tr> <td style="text-align: right;">Hindu</td> <td style="text-align: right;">1</td> <td></td> <td></td> </tr> <tr> <td style="text-align: right;">Buddhist</td> <td style="text-align: right;">2</td> <td></td> <td></td> </tr> <tr> <td style="text-align: right;">Christian</td> <td style="text-align: right;">3</td> <td></td> <td></td> </tr> </table> <p style="text-align: center;"><b>If others specify in C6 other</b></p>                                                                                                                                                                                                                                                                                                                                                                                                                                                                                                                                                                                                                                                                                                                                                                              |          |       | Hindu               | 1 |                                 |  | Buddhist                | 2 |  |  | Christian                                  | 3 |  |  | C6                       |   |  |  |                                 |   |                                                                                             |    |                                        |   |  |  |                           |    |  |  |                      |   |  |  |                      |    |  |  |    |
|                                                                                                                                                                                                                                                                                                                                                                                                                                                                                                                                                                                                                                                                                 |                                                                                                | Hindu                                                                                                                                                                                                                                                                                                                                                                                                                                                                                                                                                                                                                                                                                                                                                                                                                                                                                                                                                                                                                                                                                                                                                                                                                                                                     | 1        |       |                     |   |                                 |  |                         |   |  |  |                                            |   |  |  |                          |   |  |  |                                 |   |                                                                                             |    |                                        |   |  |  |                           |    |  |  |                      |   |  |  |                      |    |  |  |    |
| Buddhist                                                                                                                                                                                                                                                                                                                                                                                                                                                                                                                                                                                                                                                                        | 2                                                                                              |                                                                                                                                                                                                                                                                                                                                                                                                                                                                                                                                                                                                                                                                                                                                                                                                                                                                                                                                                                                                                                                                                                                                                                                                                                                                           |          |       |                     |   |                                 |  |                         |   |  |  |                                            |   |  |  |                          |   |  |  |                                 |   |                                                                                             |    |                                        |   |  |  |                           |    |  |  |                      |   |  |  |                      |    |  |  |    |
| Christian                                                                                                                                                                                                                                                                                                                                                                                                                                                                                                                                                                                                                                                                       | 3                                                                                              |                                                                                                                                                                                                                                                                                                                                                                                                                                                                                                                                                                                                                                                                                                                                                                                                                                                                                                                                                                                                                                                                                                                                                                                                                                                                           |          |       |                     |   |                                 |  |                         |   |  |  |                                            |   |  |  |                          |   |  |  |                                 |   |                                                                                             |    |                                        |   |  |  |                           |    |  |  |                      |   |  |  |                      |    |  |  |    |
| Others (specify) .....                                                                                                                                                                                                                                                                                                                                                                                                                                                                                                                                                                                                                                                          |                                                                                                |                                                                                                                                                                                                                                                                                                                                                                                                                                                                                                                                                                                                                                                                                                                                                                                                                                                                                                                                                                                                                                                                                                                                                                                                                                                                           | C6 other |       |                     |   |                                 |  |                         |   |  |  |                                            |   |  |  |                          |   |  |  |                                 |   |                                                                                             |    |                                        |   |  |  |                           |    |  |  |                      |   |  |  |                      |    |  |  |    |
| 18.                                                                                                                                                                                                                                                                                                                                                                                                                                                                                                                                                                                                                                                                             | What is your current marital status?                                                           | <table style="width: 100%; border-collapse: collapse;"> <tr> <td style="text-align: right;">Unmarried</td> <td style="text-align: right;">1</td> <td style="text-align: left;"><b>If single [1] skip to C9</b></td> <td></td> </tr> <tr> <td style="text-align: right;">Married</td> <td style="text-align: right;">2</td> <td></td> <td></td> </tr> <tr> <td style="text-align: right;">Separated</td> <td style="text-align: right;">3</td> <td></td> <td></td> </tr> <tr> <td style="text-align: right;">Divorced</td> <td style="text-align: right;">4</td> <td></td> <td></td> </tr> <tr> <td style="text-align: right;">Widow</td> <td style="text-align: right;">5</td> <td></td> <td></td> </tr> <tr> <td style="text-align: right;">Live in together</td> <td style="text-align: right;">6</td> <td></td> <td></td> </tr> <tr> <td style="text-align: right;">Prefer not to answer</td> <td style="text-align: right;">88</td> <td></td> <td></td> </tr> </table>                                                                                                                                                                                                                                                                                                |          |       | Unmarried           | 1 | <b>If single [1] skip to C9</b> |  | Married                 | 2 |  |  | Separated                                  | 3 |  |  | Divorced                 | 4 |  |  | Widow                           | 5 |                                                                                             |    | Live in together                       | 6 |  |  | Prefer not to answer      | 88 |  |  | C7                   |   |  |  |                      |    |  |  |    |
| Unmarried                                                                                                                                                                                                                                                                                                                                                                                                                                                                                                                                                                                                                                                                       | 1                                                                                              | <b>If single [1] skip to C9</b>                                                                                                                                                                                                                                                                                                                                                                                                                                                                                                                                                                                                                                                                                                                                                                                                                                                                                                                                                                                                                                                                                                                                                                                                                                           |          |       |                     |   |                                 |  |                         |   |  |  |                                            |   |  |  |                          |   |  |  |                                 |   |                                                                                             |    |                                        |   |  |  |                           |    |  |  |                      |   |  |  |                      |    |  |  |    |
| Married                                                                                                                                                                                                                                                                                                                                                                                                                                                                                                                                                                                                                                                                         | 2                                                                                              |                                                                                                                                                                                                                                                                                                                                                                                                                                                                                                                                                                                                                                                                                                                                                                                                                                                                                                                                                                                                                                                                                                                                                                                                                                                                           |          |       |                     |   |                                 |  |                         |   |  |  |                                            |   |  |  |                          |   |  |  |                                 |   |                                                                                             |    |                                        |   |  |  |                           |    |  |  |                      |   |  |  |                      |    |  |  |    |
| Separated                                                                                                                                                                                                                                                                                                                                                                                                                                                                                                                                                                                                                                                                       | 3                                                                                              |                                                                                                                                                                                                                                                                                                                                                                                                                                                                                                                                                                                                                                                                                                                                                                                                                                                                                                                                                                                                                                                                                                                                                                                                                                                                           |          |       |                     |   |                                 |  |                         |   |  |  |                                            |   |  |  |                          |   |  |  |                                 |   |                                                                                             |    |                                        |   |  |  |                           |    |  |  |                      |   |  |  |                      |    |  |  |    |
| Divorced                                                                                                                                                                                                                                                                                                                                                                                                                                                                                                                                                                                                                                                                        | 4                                                                                              |                                                                                                                                                                                                                                                                                                                                                                                                                                                                                                                                                                                                                                                                                                                                                                                                                                                                                                                                                                                                                                                                                                                                                                                                                                                                           |          |       |                     |   |                                 |  |                         |   |  |  |                                            |   |  |  |                          |   |  |  |                                 |   |                                                                                             |    |                                        |   |  |  |                           |    |  |  |                      |   |  |  |                      |    |  |  |    |
| Widow                                                                                                                                                                                                                                                                                                                                                                                                                                                                                                                                                                                                                                                                           | 5                                                                                              |                                                                                                                                                                                                                                                                                                                                                                                                                                                                                                                                                                                                                                                                                                                                                                                                                                                                                                                                                                                                                                                                                                                                                                                                                                                                           |          |       |                     |   |                                 |  |                         |   |  |  |                                            |   |  |  |                          |   |  |  |                                 |   |                                                                                             |    |                                        |   |  |  |                           |    |  |  |                      |   |  |  |                      |    |  |  |    |
| Live in together                                                                                                                                                                                                                                                                                                                                                                                                                                                                                                                                                                                                                                                                | 6                                                                                              |                                                                                                                                                                                                                                                                                                                                                                                                                                                                                                                                                                                                                                                                                                                                                                                                                                                                                                                                                                                                                                                                                                                                                                                                                                                                           |          |       |                     |   |                                 |  |                         |   |  |  |                                            |   |  |  |                          |   |  |  |                                 |   |                                                                                             |    |                                        |   |  |  |                           |    |  |  |                      |   |  |  |                      |    |  |  |    |
| Prefer not to answer                                                                                                                                                                                                                                                                                                                                                                                                                                                                                                                                                                                                                                                            | 88                                                                                             |                                                                                                                                                                                                                                                                                                                                                                                                                                                                                                                                                                                                                                                                                                                                                                                                                                                                                                                                                                                                                                                                                                                                                                                                                                                                           |          |       |                     |   |                                 |  |                         |   |  |  |                                            |   |  |  |                          |   |  |  |                                 |   |                                                                                             |    |                                        |   |  |  |                           |    |  |  |                      |   |  |  |                      |    |  |  |    |
| 19.                                                                                                                                                                                                                                                                                                                                                                                                                                                                                                                                                                                                                                                                             | How old were you when you (first) got married?                                                 | Age ..... (write the completed years)                                                                                                                                                                                                                                                                                                                                                                                                                                                                                                                                                                                                                                                                                                                                                                                                                                                                                                                                                                                                                                                                                                                                                                                                                                     |          |       | C8                  |   |                                 |  |                         |   |  |  |                                            |   |  |  |                          |   |  |  |                                 |   |                                                                                             |    |                                        |   |  |  |                           |    |  |  |                      |   |  |  |                      |    |  |  |    |
| 20.                                                                                                                                                                                                                                                                                                                                                                                                                                                                                                                                                                                                                                                                             | Which of the following best describes your husband's main work status over the past 12 months? | <table style="width: 100%; border-collapse: collapse;"> <tr> <td style="text-align: right;">Government employee</td> <td style="text-align: right;">1</td> <td></td> <td></td> </tr> <tr> <td style="text-align: right;">Non-government employee</td> <td style="text-align: right;">2</td> <td></td> <td></td> </tr> <tr> <td style="text-align: right;">Farmer/Agriculture</td> <td style="text-align: right;">3</td> <td></td> <td></td> </tr> </table>                                                                                                                                                                                                                                                                                                                                                                                                                                                                                                                                                                                                                                                                                                                                                                                                                |          |       | Government employee | 1 |                                 |  | Non-government employee | 2 |  |  | Farmer/Agriculture                         | 3 |  |  | C9                       |   |  |  |                                 |   |                                                                                             |    |                                        |   |  |  |                           |    |  |  |                      |   |  |  |                      |    |  |  |    |
| Government employee                                                                                                                                                                                                                                                                                                                                                                                                                                                                                                                                                                                                                                                             | 1                                                                                              |                                                                                                                                                                                                                                                                                                                                                                                                                                                                                                                                                                                                                                                                                                                                                                                                                                                                                                                                                                                                                                                                                                                                                                                                                                                                           |          |       |                     |   |                                 |  |                         |   |  |  |                                            |   |  |  |                          |   |  |  |                                 |   |                                                                                             |    |                                        |   |  |  |                           |    |  |  |                      |   |  |  |                      |    |  |  |    |
| Non-government employee                                                                                                                                                                                                                                                                                                                                                                                                                                                                                                                                                                                                                                                         | 2                                                                                              |                                                                                                                                                                                                                                                                                                                                                                                                                                                                                                                                                                                                                                                                                                                                                                                                                                                                                                                                                                                                                                                                                                                                                                                                                                                                           |          |       |                     |   |                                 |  |                         |   |  |  |                                            |   |  |  |                          |   |  |  |                                 |   |                                                                                             |    |                                        |   |  |  |                           |    |  |  |                      |   |  |  |                      |    |  |  |    |
| Farmer/Agriculture                                                                                                                                                                                                                                                                                                                                                                                                                                                                                                                                                                                                                                                              | 3                                                                                              |                                                                                                                                                                                                                                                                                                                                                                                                                                                                                                                                                                                                                                                                                                                                                                                                                                                                                                                                                                                                                                                                                                                                                                                                                                                                           |          |       |                     |   |                                 |  |                         |   |  |  |                                            |   |  |  |                          |   |  |  |                                 |   |                                                                                             |    |                                        |   |  |  |                           |    |  |  |                      |   |  |  |                      |    |  |  |    |

|     |                                                                                      |                                                                                                                                                                                                             |           |
|-----|--------------------------------------------------------------------------------------|-------------------------------------------------------------------------------------------------------------------------------------------------------------------------------------------------------------|-----------|
|     |                                                                                      | Daily wage worker 4<br>Foreign employment 5<br>Business 6<br>Others 7 <b>If others specify in C6 other</b><br>Prefer not to answer 88                                                                       |           |
|     |                                                                                      | Others (specify) .....                                                                                                                                                                                      | C9 other  |
| 21. | If you are married, Is your husband currently living with you or abroad?             | Unmarried 1<br>Husband at home 2<br>Husband abroad 3<br>Other 4                                                                                                                                             | C10       |
| 22. | Which of the following best describes your main work status over the past 12 months? | Homemaker 1<br>Government employee 2<br>Non-government employee 3<br>Farmer/Agriculture 4<br>Daily wage worker 5<br>Business 6<br>Others 7 <b>If others specify in C11 other</b><br>Prefer not to answer 88 | C11       |
|     |                                                                                      | Others (specify) .....                                                                                                                                                                                      | C11 other |
| 23. | What is your approximate monthly income?                                             | Daily .....<br>Weekly .....<br>Monthly .....<br>Prefer not to answer 88                                                                                                                                     | C12       |
| 24. | What is your approximate family monthly income?                                      | Daily .....<br>Weekly .....<br>Monthly .....<br>Prefer not to answer 88                                                                                                                                     | C13       |

| PREGNANCY AND OTHER DISEASE RELATED QUESTIONNAIRE |                                                                                                  |                                                                                                                                                                            |                                                                               |       |
|---------------------------------------------------|--------------------------------------------------------------------------------------------------|----------------------------------------------------------------------------------------------------------------------------------------------------------------------------|-------------------------------------------------------------------------------|-------|
| Questions                                         |                                                                                                  | Responses                                                                                                                                                                  |                                                                               | Codes |
| 25.                                               | Do you have any family member who suffered from any type of cancer?                              | Yes ..... type of cancer 1<br>No 0                                                                                                                                         |                                                                               | P1    |
| 26.                                               | Are you diagnosed with any chronic diseases?<br><br>(Multiple choice)<br><br>(Read the response) | Diabetes Yes 1 No 0<br>Hypertension Yes 1 No 0<br>COPD Yes 1 No 0<br>HIV/AIDS Yes 1 No 0<br>Cervical cancer Yes 1 No 0<br>Pre-cancer Yes 1 No 0<br>Hysterectomy Yes 1 No 0 | <b>If 'Cervical cancer / pre-cancer / hysterectomy confirm again and note</b> | P2    |

|     |                                                                                                                                                   |                                                                                                                                                                                                                                  |     |  |    |
|-----|---------------------------------------------------------------------------------------------------------------------------------------------------|----------------------------------------------------------------------------------------------------------------------------------------------------------------------------------------------------------------------------------|-----|--|----|
| 27. | How many times have you been pregnant?                                                                                                            | ..... Times<br>(Including miscarriage, still birth & abortion)                                                                                                                                                                   | P3  |  |    |
| 28. | Did you have any abortions, still births or miscarriages in the past?                                                                             | Miscarriages .....Times<br>Still births..... Times<br>Abortions .....Times                                                                                                                                                       | P4  |  |    |
| 29. | Are you pregnant now?                                                                                                                             | Yes ..... 1 <b>If participant is pregnant note</b><br><i>write completed months</i><br>No 0<br>Unmarried 55                                                                                                                      | P5  |  |    |
| 30. | How old were you at the time of your first pregnancy?                                                                                             | .....Age<br>(Write the completed year)<br>Don't know 66<br>Don't remember 77<br>Unmarried 55                                                                                                                                     | P6  |  |    |
| 31. | How many children do you have now?                                                                                                                | Zero 1 <b>If the answer is zero or one child then skip to P9</b><br>Total children .....<br>Son.....<br>Daughter.....<br>Unmarried 55                                                                                            | P7  |  |    |
| 32. | What is the shortest birth interval between your children?<br><br><i>(Consider the shortest birth interval if she has more than two children)</i> | <table border="1" style="display: inline-table; vertical-align: middle;"><tr><td style="width: 20px; height: 20px;"></td><td style="width: 20px; height: 20px;"></td></tr></table><br>(write the complete years)<br>Unmarried 55 |     |  | P8 |
|     |                                                                                                                                                   |                                                                                                                                                                                                                                  |     |  |    |
| 33. | Do you know what is .....?                                                                                                                        | Condom Yes 1 No 0<br>Pills / Nilocon Yes 1 No 0<br>Sangini Yes 1 No 0<br>IUD Yes 1 No 0<br>Implant /Norplant Yes 1 No 0<br>Withdrawal Yes 1 No 0<br>Rhythm method Yes 1 No 0                                                     | P9  |  |    |
| 34. | Have you ever used .....?                                                                                                                         | Condom Yes 1 No 0<br>Pills / Nilocon Yes 1 No 0<br>Sangini Yes 1 No 0<br>IUD Yes 1 No 0<br>Implant /Norplant Yes 1 No 0<br>Withdrawal Yes 1 No 0<br>Rhythm method Yes 1 No 0                                                     | P10 |  |    |
| 35. | Among the devices / method used, which one is the latest?                                                                                         | Condom 1<br>Pills / Nilocon 2<br>Sangini 3<br>IUD 4<br>Implant /Norplant 5<br>Withdrawal 6<br>Rhythm method 7                                                                                                                    | P11 |  |    |

|     |                                                                     |                                     |               |     |
|-----|---------------------------------------------------------------------|-------------------------------------|---------------|-----|
|     |                                                                     | Other                               | 8             |     |
| 36. | How many weeks earlier, you have used that device / method?         | .....                               | Weeks earlier | P12 |
| 37. | Do you smoke?                                                       | Yes                                 | 1             | P13 |
|     |                                                                     | I was a previous smoker             | 2             |     |
|     |                                                                     | No, I have never smoked             | 3             |     |
| 38. | Do you use smokeless tobacco products? (E.g. Surti, Khaini, Gutkha) | Yes .....                           | (specify) 1   | P14 |
|     |                                                                     | I used it earlier.....              | (specify) 2   |     |
|     |                                                                     | No I have never used                | 3             |     |
| 39. | Do you drink alcohol?                                               | Yes, regularly                      | 1             | P15 |
|     |                                                                     | Yes, occasionally                   | 2             |     |
|     |                                                                     | I used to drink earlier now stopped | 3             |     |
|     |                                                                     | Never                               | 4             |     |

| HEALTH-SEEKING BEHAVIOR |                                                                                                                        |                                                        |                                         |             |
|-------------------------|------------------------------------------------------------------------------------------------------------------------|--------------------------------------------------------|-----------------------------------------|-------------|
| Questions               |                                                                                                                        | Responses                                              |                                         | Codes       |
| 40.                     | What means of transportation do you use to the nearest health facility?                                                | On foot                                                | 1                                       | H1          |
|                         |                                                                                                                        | Bus                                                    | 2                                       |             |
|                         |                                                                                                                        | Motorbike                                              | 3                                       |             |
|                         |                                                                                                                        | Others                                                 | 4                                       |             |
|                         |                                                                                                                        | Don't know                                             | 66 <b>If others specify in H1 other</b> |             |
|                         |                                                                                                                        | Others (specify) .....                                 |                                         | H1<br>other |
| 41.                     | How long time does it take you to reach the nearest health facility from your house?                                   | .....                                                  | (in minutes)                            | H2          |
| 42.                     | Where do you usually go first if you are sick, or to treat a general health problem?<br>(Check all that are mentioned) | Private clinic                                         | 1                                       | H3          |
|                         |                                                                                                                        | Government clinic or hospital                          | 2                                       |             |
|                         |                                                                                                                        | Traditional healer                                     | 3                                       |             |
|                         |                                                                                                                        | Clinic run by an NGO                                   | 4                                       |             |
|                         |                                                                                                                        | Others                                                 | 5 <b>If others specify in H3 others</b> |             |
|                         |                                                                                                                        | Others (specify) .....                                 |                                         | H3<br>other |
| 43.                     | How often do you generally seek health care at a clinic or hospital in the last five years? (Check one.)               | Twice a year or more                                   | 1                                       | H4          |
|                         |                                                                                                                        | Once per year                                          | 2                                       |             |
|                         |                                                                                                                        | Less than once a year but at least twice in past 5 yrs | 3                                       |             |
|                         |                                                                                                                        | Once in past 5 years                                   | 4                                       |             |
|                         |                                                                                                                        | Never in past 5 years                                  | 5                                       |             |
|                         |                                                                                                                        | Others                                                 | 6 <b>If others specify in H4 others</b> |             |
|                         |                                                                                                                        | Others (specify) .....                                 |                                         | H4<br>other |
|                         |                                                                                                                        |                                                        |                                         |             |
|                         |                                                                                                                        |                                                        |                                         |             |

| KNOWLEDGE RELATED QUESTIONNAIRE ON CERVICAL CANCER |                                                                                                      |                                                                                                                                                                                                                                                                                  |               |
|----------------------------------------------------|------------------------------------------------------------------------------------------------------|----------------------------------------------------------------------------------------------------------------------------------------------------------------------------------------------------------------------------------------------------------------------------------|---------------|
| Questions                                          |                                                                                                      | Responses                                                                                                                                                                                                                                                                        | Codes         |
| 44.                                                | 1. Have you ever heard about cervical cancer? Total score = 1                                        | Yes 1<br>No 0 <b>If No [2] skip to KS1</b>                                                                                                                                                                                                                                       | KC1           |
| 45.                                                | 2. If yes, how did you come to know about cervical cancer? (Multiple responses)<br><br>Total score = | Television 1<br>Radio 2<br>Newspaper 3<br>Health personnel 4<br>Relatives 5<br>Friends 6<br>FCHV 7<br>Others 8 <b>If others specify in KC2 others</b>                                                                                                                            | KC2<br>others |
|                                                    |                                                                                                      | Others (specify) .....                                                                                                                                                                                                                                                           |               |
| 46.                                                | 3. What do you mean by cervical cancer?                                                              | Pain in cervix 1<br>Abnormal growth of the cells of cervix 2<br>Swelling in the cervix 3<br>4<br>Don't know 66                                                                                                                                                                   | KC3<br>others |
|                                                    |                                                                                                      | Others (specify) .....                                                                                                                                                                                                                                                           |               |
| 47.                                                | 4. Do you know the sign and symptoms of cervical cancer?                                             | Yes 1<br>No 0 <b>If No [2] skip to KC6</b>                                                                                                                                                                                                                                       | KC4           |
| 48.                                                | 5. What are the signs and symptoms of cervical cancer? (Multiple responses)                          | No symptoms at early stage 1<br>Blood spots or light bleeding between or following periods 2<br>Bleeding after sexual intercourse 3<br>Bleeding after menopause 4<br>Pain during sexual intercourse 5<br>Increased vaginal discharge 6<br><b>If others specify in KC5 others</b> | KC5<br>others |
|                                                    |                                                                                                      | Others (specify) .....                                                                                                                                                                                                                                                           |               |

|                        |                                                                                                                                                              |                                                                                                                                                                                                                                                                                      |                                        |                |
|------------------------|--------------------------------------------------------------------------------------------------------------------------------------------------------------|--------------------------------------------------------------------------------------------------------------------------------------------------------------------------------------------------------------------------------------------------------------------------------------|----------------------------------------|----------------|
| 49.                    | 6. In your opinion, what are the risk factors for cervical cancer? (Multiple responses)                                                                      | Human papillomavirus (HPV) 1<br>Smoking 2<br>Early marriage 3<br>Having many children 4<br>Having many sexual partners 5<br>Alcoholic drinks 6<br>Long-term oral contraceptive use 7<br>Low socio-economic status 8                                                                  | <b>If others specify in KC5 others</b> | KC6            |
|                        |                                                                                                                                                              | Others (specify) .....                                                                                                                                                                                                                                                               |                                        | KC6<br>others  |
| 50.                    | 7. Have you heard about Human Papilloma Virus infection?                                                                                                     | Yes 1<br>No 2                                                                                                                                                                                                                                                                        | <b>If No [2] skip to KC9</b>           | KC7            |
| 51.                    | 8. If Yes, tell me how is Human Papilloma Virus transmitted?                                                                                                 | Air pollution 1<br>Water pollution 2<br>Sexual contact 3<br>Others 4                                                                                                                                                                                                                 | <b>If others specify in KC8 others</b> | KC8            |
|                        |                                                                                                                                                              | Others (specify) .....                                                                                                                                                                                                                                                               |                                        | KC8<br>others  |
| 52.                    | 9. How can cervical cancer be prevented? (Multiple responses)                                                                                                | Avoiding multiple sexual partners 1<br>Avoiding multiple pregnancies 2<br>Avoiding early marriage 3<br>Avoiding early sexual exposure 4<br>Maintaining personal hygiene 5<br>Avoiding long term oral contraceptive use 6<br>Early treatment of STI 7<br>Regular cervical screening 8 | <b>If others specify in KC9 others</b> | KC9            |
|                        |                                                                                                                                                              | Don't know 66                                                                                                                                                                                                                                                                        |                                        |                |
| Others (specify) ..... |                                                                                                                                                              |                                                                                                                                                                                                                                                                                      |                                        | KC9<br>others  |
| 53.                    | 10. Have you ever heard about the vaccine that may prevent cervical cancer?                                                                                  | Yes 1<br>No 0                                                                                                                                                                                                                                                                        | <b>If No [2] skip to KS1</b>           | KC10           |
| 54.                    | 11. Do you know when the best time to vaccinate against HPV is?<br>At a young age (9-13 years)<br>Reference age from the pilot program in Chitwan and Kaski. | At a young age (9-13 years) 1<br>Before first sexual contact 2<br>After first sexual contact 3<br>After first childbirth 4<br>At any time 5<br>Others 6                                                                                                                              | <b>If others specify in KC9 others</b> | KC11           |
|                        |                                                                                                                                                              | Don't know 66                                                                                                                                                                                                                                                                        |                                        |                |
| Others (specify) ..... |                                                                                                                                                              |                                                                                                                                                                                                                                                                                      |                                        | KC11<br>others |

| KNOWLEDGE RELATED QUESTIONNAIRE ON SCREENING |                                                                                                         |                                                                                                                                                                                                         |               |
|----------------------------------------------|---------------------------------------------------------------------------------------------------------|---------------------------------------------------------------------------------------------------------------------------------------------------------------------------------------------------------|---------------|
| Questions                                    |                                                                                                         | Responses                                                                                                                                                                                               | Codes         |
| 55.                                          | 12. Have you ever heard about cervical cancer screening using Visual Inspection with acetic acid (VIA)? | Yes 1<br>No 0 <b>If No [2] skip to AC1</b>                                                                                                                                                              | KS1           |
| 56.                                          | 13. If yes, how did you hear or know about VIA?                                                         | Television 1<br>Radio 2<br>Newspaper 3<br>Health personnel 4<br>Relatives 5<br>Friends 6<br>FCHV 7<br>Others 8 <b>If others specify in KS2 others</b>                                                   | KS2           |
|                                              |                                                                                                         | Others (specify) .....                                                                                                                                                                                  | KS2<br>others |
| 57.                                          | 14. Do you know when the best time to perform VIA is?                                                   | 15-49 years old 1<br>60-80 years old 2<br>30-60 years old 3<br>Others 4<br>Don't know 66                                                                                                                | KS3           |
|                                              |                                                                                                         | Others (specify) .....                                                                                                                                                                                  | KS3<br>others |
| 58.                                          | 15. Do you know how frequently a woman should have VIA performed?                                       | Once 30 years old, every 3-5 years 1<br>Every 3 years 2<br>Every 5 years 3<br>Once in a lifetime, at any age 4<br>When gynecological symptoms appear 5<br>Every 6 months 6<br>Others 7<br>Don't know 66 | KS4           |
|                                              |                                                                                                         | Others (specify) .....                                                                                                                                                                                  | KS4<br>others |
| 59.                                          | 16. Have you ever heard about any other methods of cervical cancer screening? (Multiple responses)      | Pap test 1<br>HPV test 2<br>Others 3 <b>If others specify in KS5 others</b><br>No 4                                                                                                                     | KS5           |
|                                              |                                                                                                         | Others (specify) .....                                                                                                                                                                                  | KS5<br>others |

| ATTITUDE |                                                         |                   |          |            |       |                |      |
|----------|---------------------------------------------------------|-------------------|----------|------------|-------|----------------|------|
|          | Statement on Attitude towards cervical cancer screening | Strongly Disagree | Disagree | Un decided | Agree | Strongly agree | Code |
| 60.      | Many women are suffering from cervical cancer in Nepal. |                   |          |            |       |                | AC1  |
| 61.      | Cervical cancer is a potentially fatal disease.         |                   |          |            |       |                | AC2  |



|     |                                                                                                                                                                    |  |  |  |  |  |      |
|-----|--------------------------------------------------------------------------------------------------------------------------------------------------------------------|--|--|--|--|--|------|
| 62. | Any adult women can acquire cervical cancer.                                                                                                                       |  |  |  |  |  | AC3  |
| 63. | Cervical cancer can be detected early through various screening method.                                                                                            |  |  |  |  |  | AC4  |
| 64. | Screening helps in prevention of cervical cancer.                                                                                                                  |  |  |  |  |  | AC5  |
| 65. | Screening causes no harm to the client.                                                                                                                            |  |  |  |  |  | AC6  |
| 66. | I will go for screening if it is free of cost.                                                                                                                     |  |  |  |  |  | AC7  |
| 67. | HPV vaccination can prevent cervical cancer.                                                                                                                       |  |  |  |  |  | AC8  |
| 68. | I will recommend HPV vaccination for my daughters / young girls if it is free of cost.                                                                             |  |  |  |  |  | AC9  |
| 69. | I would collect a sample by myself to test for cervical cancer either at a health-care clinic or in home, if I am given instructions on how to collect the sample. |  |  |  |  |  | AC10 |

### I. CERVICAL CANCER SCREENING PRACTICE

| Questions |                                                                | Responses                                                                                                                                                                                              | Codes      |
|-----------|----------------------------------------------------------------|--------------------------------------------------------------------------------------------------------------------------------------------------------------------------------------------------------|------------|
| 70.       | Has a health-care worker ever tested you for cervical cancer?  | Yes 1<br>No 0 <b>If No [0] skip to SP15</b><br>(Do not read) Don't know 66<br>(Do not read) Prefer not to answer 88                                                                                    | SP1        |
| 71.       | If screened, do you have the screening report?                 | Yes, showed screening report 1<br>Yes, did not show screening report 2<br>No 0                                                                                                                         | SP2        |
| 72.       | If yes, who suggested you to go for cervical cancer screening? | Husband 1 <b>If Husband [1] skip to SP5</b><br>Health worker 2<br>Family member 3<br>Relatives 4<br>Yourself 5<br>Friends 6<br>FCHV 7<br>Mothers group 8<br><br><b>If others specify in SP3 others</b> | SP3        |
|           |                                                                | Others (specify) .....                                                                                                                                                                                 | SP3 others |
| 73.       | Did your husband support your cervical cancer screening?       | Yes 1<br>No 0<br>Did not say anything 3<br>Did not ask husband 4<br><br>Prefer not to answer 88                                                                                                        | SP4        |

|     |                                                                                               |                                                                                                                                                                                                                                                                              |                                        |
|-----|-----------------------------------------------------------------------------------------------|------------------------------------------------------------------------------------------------------------------------------------------------------------------------------------------------------------------------------------------------------------------------------|----------------------------------------|
| 74. | How regularly is your cervical cancer screening (VIA/Pap test/HPV test) done?                 | Every 2 years 1<br>Every 3 years 2<br>Every 5 years or more 3<br>Not regularly 4<br>Others 5                                                                                                                                                                                 | <b>If others specify in SP5 others</b> |
|     |                                                                                               | Others (specify) .....                                                                                                                                                                                                                                                       | SP5 others                             |
| 75. | At what age, where you first screened for cervical cancer?                                    | Age <input type="text"/> <input type="text"/><br>(Do not read) Don't know 66<br>(Do not read) Prefer not to answer 88                                                                                                                                                        | SP6                                    |
| 76. | When was your last cervical cancer screening done?                                            | Less than 1 year ago 1<br>1-2 years ago 2<br>3-5 years ago 3<br>More than 5 years ago 4<br>Others 5<br>(Do not read) Don't know<br>(Do not read) Refused 66<br>.....Year ..... month 88                                                                                      | <b>If others specify in SP5 others</b> |
|     |                                                                                               | Others (specify) .....                                                                                                                                                                                                                                                       | SP7 others                             |
| 77. | What is the MAIN reason for you getting your last cervical cancer screening? (check only one) | Part of routine examination 1<br>Follow up on abnormal/ inconclusive result 2<br>Recommended by health-care provider 3<br>Recommended by other source freinds & neighbors 4<br>Experiencing pain or other symptoms 5<br>Others 6<br>Don't know 66<br>Prefer not to answer 88 | SP8                                    |
|     |                                                                                               | <b>If others specify in SP5 others</b><br>Others (specify) .....                                                                                                                                                                                                             | SP8 others                             |
| 78. | Where did you receive your last test for cervical cancer?                                     | Private clinic 1<br>Government clinic or hospital 2<br>Community hospital or health institution 3<br>Clinic run by an NGO 4<br>Health camp 5<br>Traditional healer 6<br>Others 7                                                                                             | <b>If others specify in SP9 others</b> |
|     |                                                                                               | Others (specify) .....                                                                                                                                                                                                                                                       | SP9 others                             |

|     |                                                                                                                                                            |                                                                                                                                                                                                                                                                                                                                                                                                                                 |             |
|-----|------------------------------------------------------------------------------------------------------------------------------------------------------------|---------------------------------------------------------------------------------------------------------------------------------------------------------------------------------------------------------------------------------------------------------------------------------------------------------------------------------------------------------------------------------------------------------------------------------|-------------|
| 79. | What was the result of your last test for cervical cancer?                                                                                                 | Did not receive result 1 <b>If [1] skip to SS1</b><br>Normal/negative 2<br>Abnormal/positive 3<br>Suspect cancer 4<br>Inconclusive 5<br>(Do not read) Don't know 66<br>(Do not read) Prefer not to answer 88                                                                                                                                                                                                                    | SP10        |
| 80. | Did you have any follow-up visits because of your last test result?                                                                                        | Yes 1<br>No 2<br>(Do not read) Don't know 66<br>(Do not read) Prefer not to answer 88                                                                                                                                                                                                                                                                                                                                           | SP11        |
| 81. | Did you receive any treatment of your cervix because of your last test result?                                                                             | Yes 1<br>No 2 <b>If No [2] skip to SP14</b><br>(Do not read) Don't know 66 } <b>If [66] or [88]</b><br>(Do not read) Prefer not to answer 88 } <b>skip to SS1</b>                                                                                                                                                                                                                                                               | SP12        |
| 82. | Did you receive the treatment of your cervix during the same visit as your last test for cervical cancer?                                                  | Yes 1 <b>If [1] skip to SS1</b><br>No 2<br>(Do not read) Don't know 66 } <b>If [66] or [88]</b><br>(Do not read) Prefer not to answer 88 } <b>skip to SS1</b>                                                                                                                                                                                                                                                                   | SP13        |
| 83. | What is the MAIN reason you did not receive treatment as a result of your last test result? (check only one)<br><br><b>Skip to SS1 after this question</b> | Was not told I needed treatment 1<br>Did not know how/where to get treatment 2<br>Embarrassment 3<br>Too expensive 4<br>Didn't have time 5<br>Clinic too far away 6<br>Poor service quality 7<br>Afraid of the procedure 8<br>Afraid of social stigma 9<br>Cultural beliefs 10<br>Family member would not allow it 11<br>Who (specify relationship to respondent)?<br>.....<br>Others 12 <b>If others specify in SP9 others</b> | SP14        |
|     |                                                                                                                                                            | (Do not read) Don't know 66 } <b>Skip to</b><br>(Do not read) Prefer not to answer 88 } <b>SS1</b>                                                                                                                                                                                                                                                                                                                              |             |
|     |                                                                                                                                                            | Others (specify) .....                                                                                                                                                                                                                                                                                                                                                                                                          | SP14 others |
| 84. | What is the MAIN reason for not receiving cervical cancer screening?                                                                                       | Lack of knowledge about VIA 1<br>Embarrassing 2<br>Economic constraint 3<br>No symptoms/not feeling any discomfort 4<br>Afraid of the result 5                                                                                                                                                                                                                                                                                  | SP15        |

|     |                                                           |                                                                                                                                                                                                                                                                                                                                                                                                                                                                                                                                                 |             |
|-----|-----------------------------------------------------------|-------------------------------------------------------------------------------------------------------------------------------------------------------------------------------------------------------------------------------------------------------------------------------------------------------------------------------------------------------------------------------------------------------------------------------------------------------------------------------------------------------------------------------------------------|-------------|
|     |                                                           | Discouraged by husband or other 6<br>Do not like the attitude of medical professionals 7<br>Don't trust the test results 8<br>No access to health facility where the VIA is done 9<br><br>Busy no time 10<br>Hesitation as health worker is a relative 11<br>Screening conducted by a male doctor 12<br>Did not screen due to personal reasons 13<br>Do not feel screening is necessary 14<br>Do not care any consequences from not screening 15<br>Believe in household herbs than screening 16<br><br><b>If others specify in SP15 others</b> |             |
|     |                                                           | Others (specify) .....                                                                                                                                                                                                                                                                                                                                                                                                                                                                                                                          | SP15 others |
| 85. | When was the last time you had a gynecological exam done? | Less than one year ago 1<br>More than 1 year ago 2<br>2 years ago 3<br>More than 2 years ago 4<br>3 years ago 5<br>3 to 5 years ago 6<br>More than 5 years ago 7<br>Never undergone gynecological examination 8<br>unmarried<br><br><b>9 If others specify in SP16 others</b>                                                                                                                                                                                                                                                                   | SP16        |
|     |                                                           | Others (specify) .....                                                                                                                                                                                                                                                                                                                                                                                                                                                                                                                          | SP16 others |

| SIGN AND SYMPTOMS |                                                                                                                 |                                                   |                                     |
|-------------------|-----------------------------------------------------------------------------------------------------------------|---------------------------------------------------|-------------------------------------|
| Questions         |                                                                                                                 | Responses                                         | Codes                               |
| 86.               | During the last 12 months, did you ever experience pain in your lower abdomen? (except during menstrual period) | Yes 1<br>No 0<br>Prefer not to answer 88          | SS1<br><b>If No [2] skip to SS3</b> |
| 87.               | If yes, how much did/does this bother you?                                                                      | Somewhat 1<br>Quite a bit/frequently 2<br>Daily 3 | SS2                                 |
| 88.               | Do you usually experience pain in the pelvic area?                                                              | Yes 1<br>No 0<br>Prefer not to answer 88          | SS3<br><b>If No [2] skip to SS5</b> |

|     |                                                                                |                                                                                                                                                                 |            |
|-----|--------------------------------------------------------------------------------|-----------------------------------------------------------------------------------------------------------------------------------------------------------------|------------|
| 89. | If yes, how much does this bother you?                                         | Somewhat 1<br>Quite a bit/frequently 2<br>Daily 3                                                                                                               | SS4        |
| 90. | In the last 12 months, have you experienced foul-smelling genital discharge?   | Yes 1<br>No 0<br>Prefer not to answer 88                                                                                                                        | SS5        |
| 91. | In the last 12 months, have you experienced unusual bleeding from your vagina? | Yes 1<br>No 0<br>Prefer not to answer 88 } <b>If No [2] skip to SSM1</b>                                                                                        | SS6        |
| 92. | Where did you go for checkup when you experienced these symptoms?              | Private clinic 1<br>Government clinic or hospital 2<br>Traditional healer 3<br>Clinic run by an NGO 4<br>Others 5<br><br><b>If others specify in SS7 others</b> | SS7        |
|     |                                                                                | Others (specify) .....                                                                                                                                          | SS7 others |

| <b>SIGN AND SYMPTOMS (FOR MARRIED WOMEN)</b> |                                                          |                                                                                                  |              |
|----------------------------------------------|----------------------------------------------------------|--------------------------------------------------------------------------------------------------|--------------|
| <b>Questions</b>                             |                                                          | <b>Responses</b>                                                                                 | <b>Codes</b> |
| 93.                                          | Do you experience difficulties or pain while having sex? | Yes 1<br>No 0<br>Prefer not to answer 88 } <b>If No [2] or Prefer not to answer skip to SSM3</b> | SSM1         |
| 94.                                          | If yes, how much does this bother you?                   | Somewhat 1<br>Quite a bit/frequently 2<br>Daily 3                                                | SSM2         |
| 95.                                          | Do you experience bleeding while having sex?             | Yes 1<br>No 0<br>Prefer not to answer 88 } <b>If No [2] or Prefer not to answer skip to MS1</b>  | SSM3         |
| 96.                                          | If yes, how much does this bother you?                   | Somewhat 1<br>Quite a bit/frequently 2<br>Daily 3                                                | SSM4         |
